# Supplementary material
Source: PubMed Central journal article supplement (PMC9253134)
Supplement: 41422_2022_643_MOESM1_ESM.pdf [file 41422_2022_643_MOESM1_ESM.pdf]

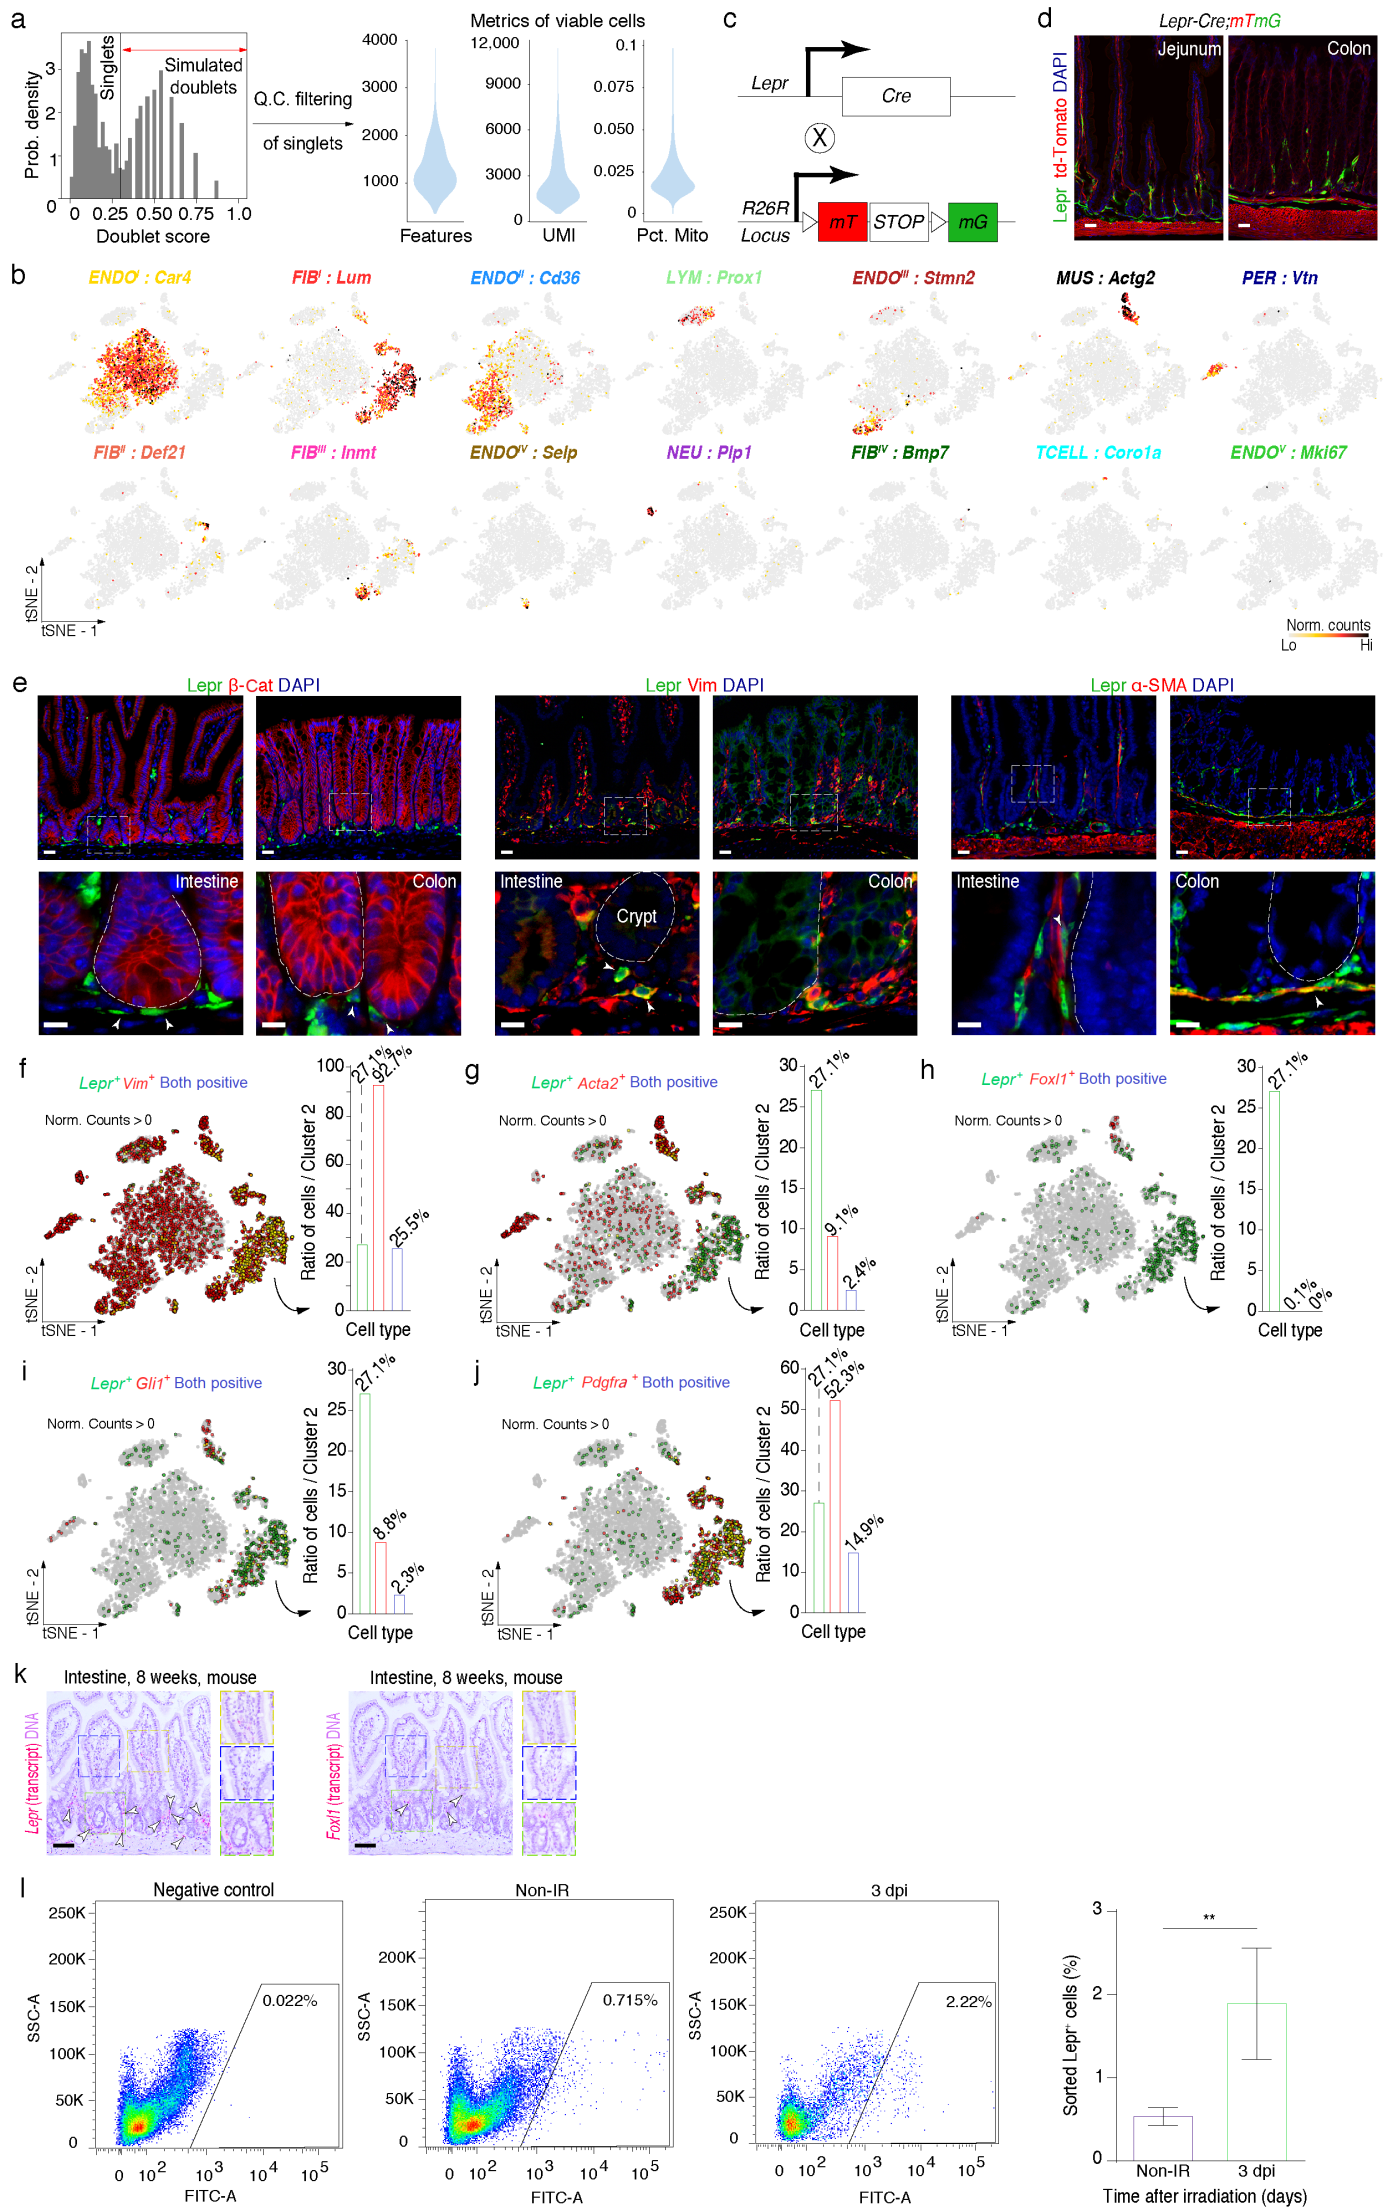

**Fig. S1 *Lepr*<sup>+</sup> MCs surround intestinal crypts and are expanded upon irradiation.** **a** Bimodal distribution of predicted singlet and doublet intestinal crypt MCs. Straight solid line indicates user-defined doublet score threshold. Singlets were further filtered to remove low-quality cells. Distribution of features/cell, UMI counts/cell, and percentage of mitochondrial genes/cell in valid cells post-filtering. Valid cells were used in downstream query and comparative analysis. **b** Feature plots of the identified marker genes in each cluster based on normalized counts. Expression levels for each cell are color-coded. Gray represents low expression and black represents high expression. **c** Schematic representation for generation of *Lepr-Cre;mTmG* mice. **d** High magnification images for GFP (*Lepr*<sup>+</sup> cells) and td-Tomato in jejunum and colon from *Lepr-Cre;mTmG* mice (n=3). Related to main **Fig. 1h**. Scale bar: 25  $\mu$ m. **e** Immunofluorescence analysis for RFP (referred to *Lepr*<sup>+</sup> cells) and epithelial cell marker  $\beta$ -Catenin, MC marker Vimentin, and muscle-like MC marker  $\alpha$ -SMA in the jejunum and colon from *Lepr-Cre;td-Tomato* mice. Arrowheads indicate double positive cells (appearing in yellow). n=3. The dashed line indicates the border between intestinal epithelium and mesenchyme in the crypts. Scale bar: upper panels, 25  $\mu$ m; bottom panels, 10  $\mu$ m. **f, g** Co-expression of *Lepr* and *Vim* (**f**) or *Acta2* (**g**) was visualized using t-SNE plot. Each dot represents an individual cell. **h - j** Co-expression of *Lepr* and *Foxl1* (**h**), *Gli1* (**i**) and *Pdgfra* (**j**) was visualized using t-SNE plot. Each dot represents an individual cell. **k** *In situ* hybridization for *Lepr* and *Foxl1* in jejunum of 8-week-old WT mice. Arrowheads point to positive signals. Insets on the right represent large magnification of selected areas (n=3). Scale bar: 50  $\mu$ m. **l** Representative FACS plots for *Lepr*<sup>+</sup> cells physically isolated from *Lepr-Cre;mTmG* mice before or three days postirradiation. MCs isolated from WT mice were used as negative control. Quantification of the percentage of sorted *Lepr*<sup>+</sup> cells (n=3). Values in the graphs represent means  $\pm$  SD. Unpaired student's t-test was used for calculating P values in **l**, \*\**P* < 0.01.
