# Supplementary material
Source: PubMed Central journal article supplement (PMC9253134)
Supplement: 41422_2022_643_MOESM2_ESM.pdf [file 41422_2022_643_MOESM2_ESM.pdf]

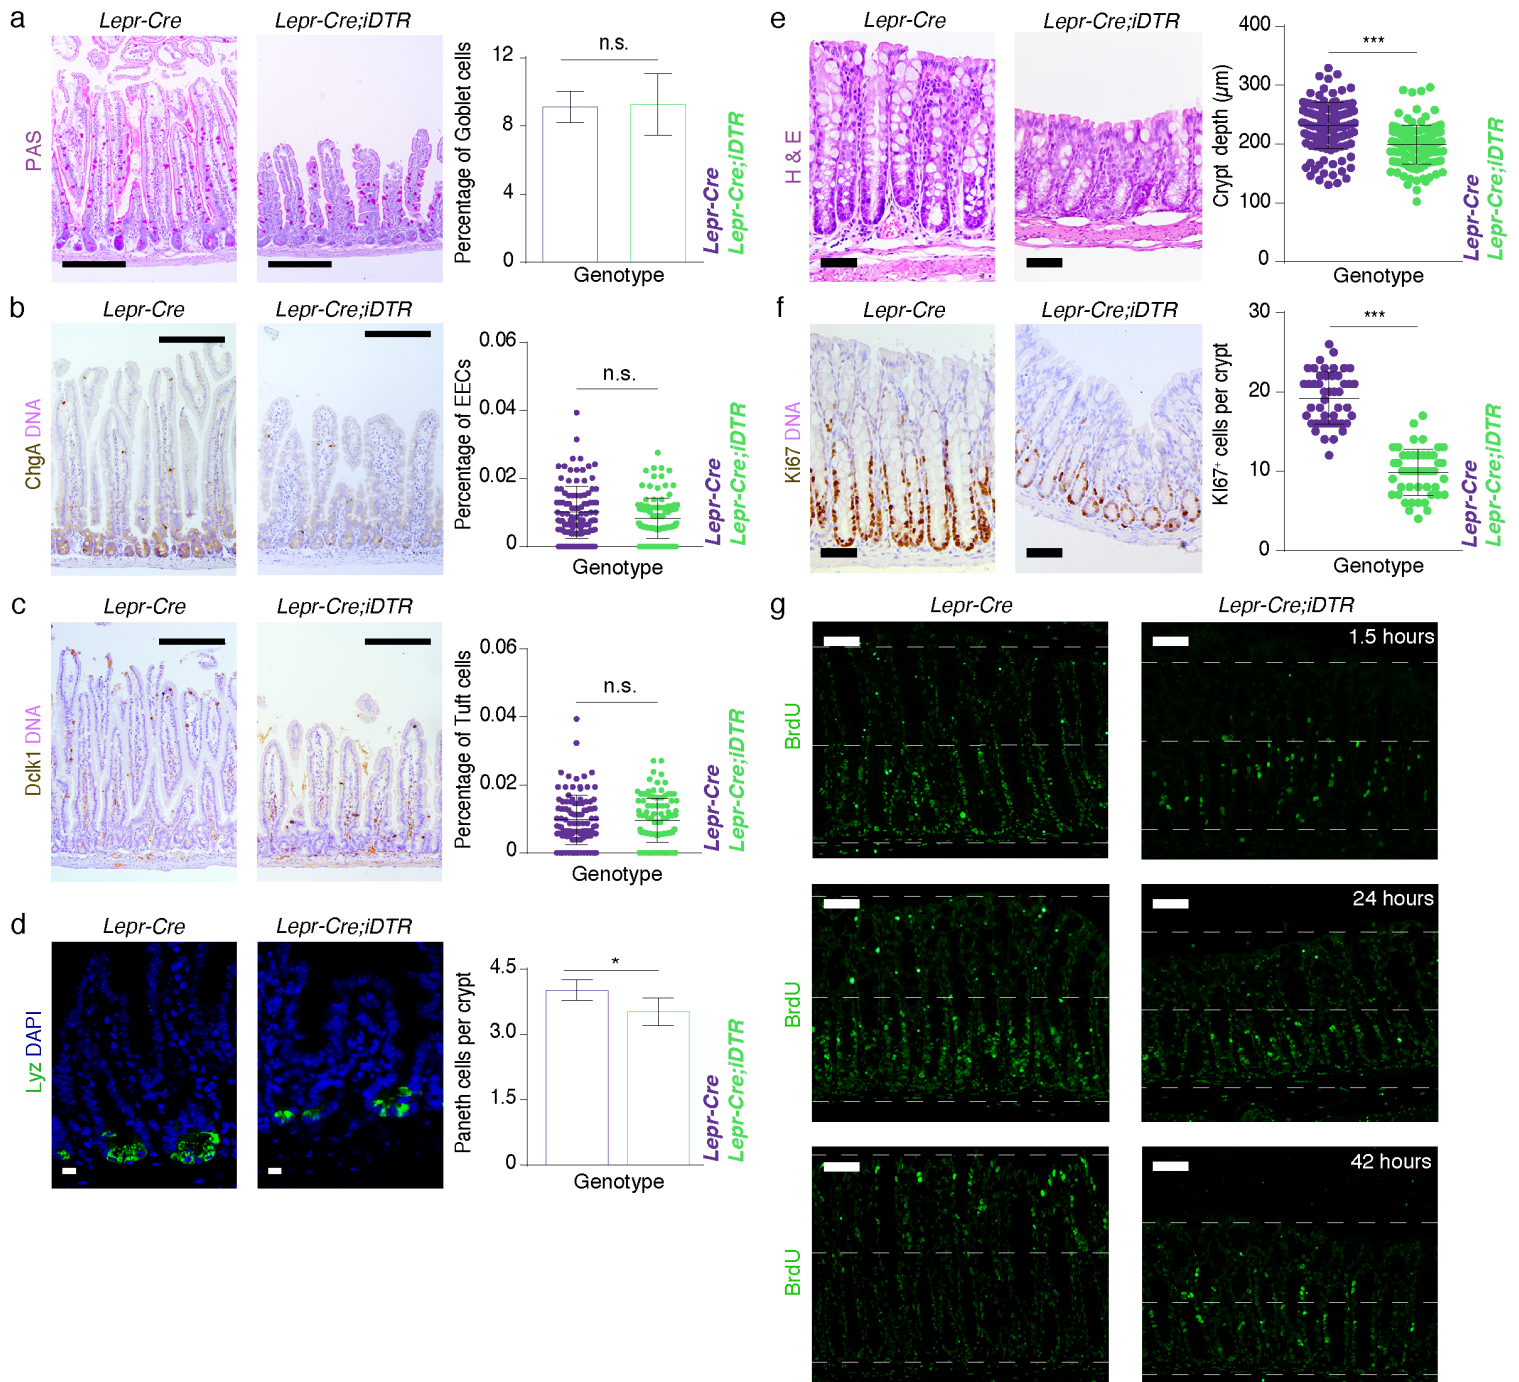

**Fig. S2 Ablation of Lepr<sup>+</sup> cells led to disrupted colonic homeostasis.** **a** PAS staining in the jejunum from *Lepr-Cre* and *Lepr-Cre;iDTR* mice. The mice were injected intraperitoneally with DT for 10 consecutive days. Quantification of the percentage of goblet cells from *Lepr-Cre* and *Lepr-Cre;iDTR* mice (n=3). Scale bar: 200  $\mu$ m. **b, c** Immunohistochemistry for ChgA (**b**) and Dclk1 (**c**) in the jejunum from *Lepr-Cre* and *Lepr-Cre;iDTR* mice. The mice were injected intraperitoneally with DT for 10 consecutive days. The percentage of EECs and Tuft cells in intestine was quantified (n=3). Scale bar: 200  $\mu$ m. **d** Immunofluorescence for Lysozyme in the jejunum from *Lepr-Cre* and *Lepr-Cre;iDTR* mice. The mice were injected intraperitoneally with DT for 10 consecutive days. Quantification of Paneth cells per crypt (n=3). Scale bar: 10  $\mu$ m. **e** Histology of colons from *Lepr-Cre* and *Lepr-Cre;iDTR* mice treated for 10 consecutive days with DT. Crypt depth was quantified (n=3). Scale bar: 50  $\mu$ m. **f** Immunohistochemistry for Ki67 in colons from *Lepr-Cre* and *Lepr-Cre;iDTR* mice treated with DT for 10 consecutive days. Ki67<sup>+</sup> cells per crypt were quantified (n=3). Scale bar: 50  $\mu$ m. **g** Immunofluorescence for BrdU in colons from *Lepr-Cre* and *Lepr-Cre;iDTR* mice at indicated timepoints post BrdU pulse chase. Dashed lines demarcate the top, middle and base of crypts, respectively. n=3 biological replicates at each timepoints. Scale bar: 50  $\mu$ m. Values in the graphs represent means  $\pm$  SD. Unpaired student's t-test was used for calculating P values in **a - f**, \* $P < 0.05$ ; \*\*\* $P < 0.001$ ; n.s., not significant.
