# Supplementary material
Source: PubMed Central journal article supplement (PMC9253134)
Supplement: 41422_2022_643_MOESM3_ESM.pdf [file 41422_2022_643_MOESM3_ESM.pdf]

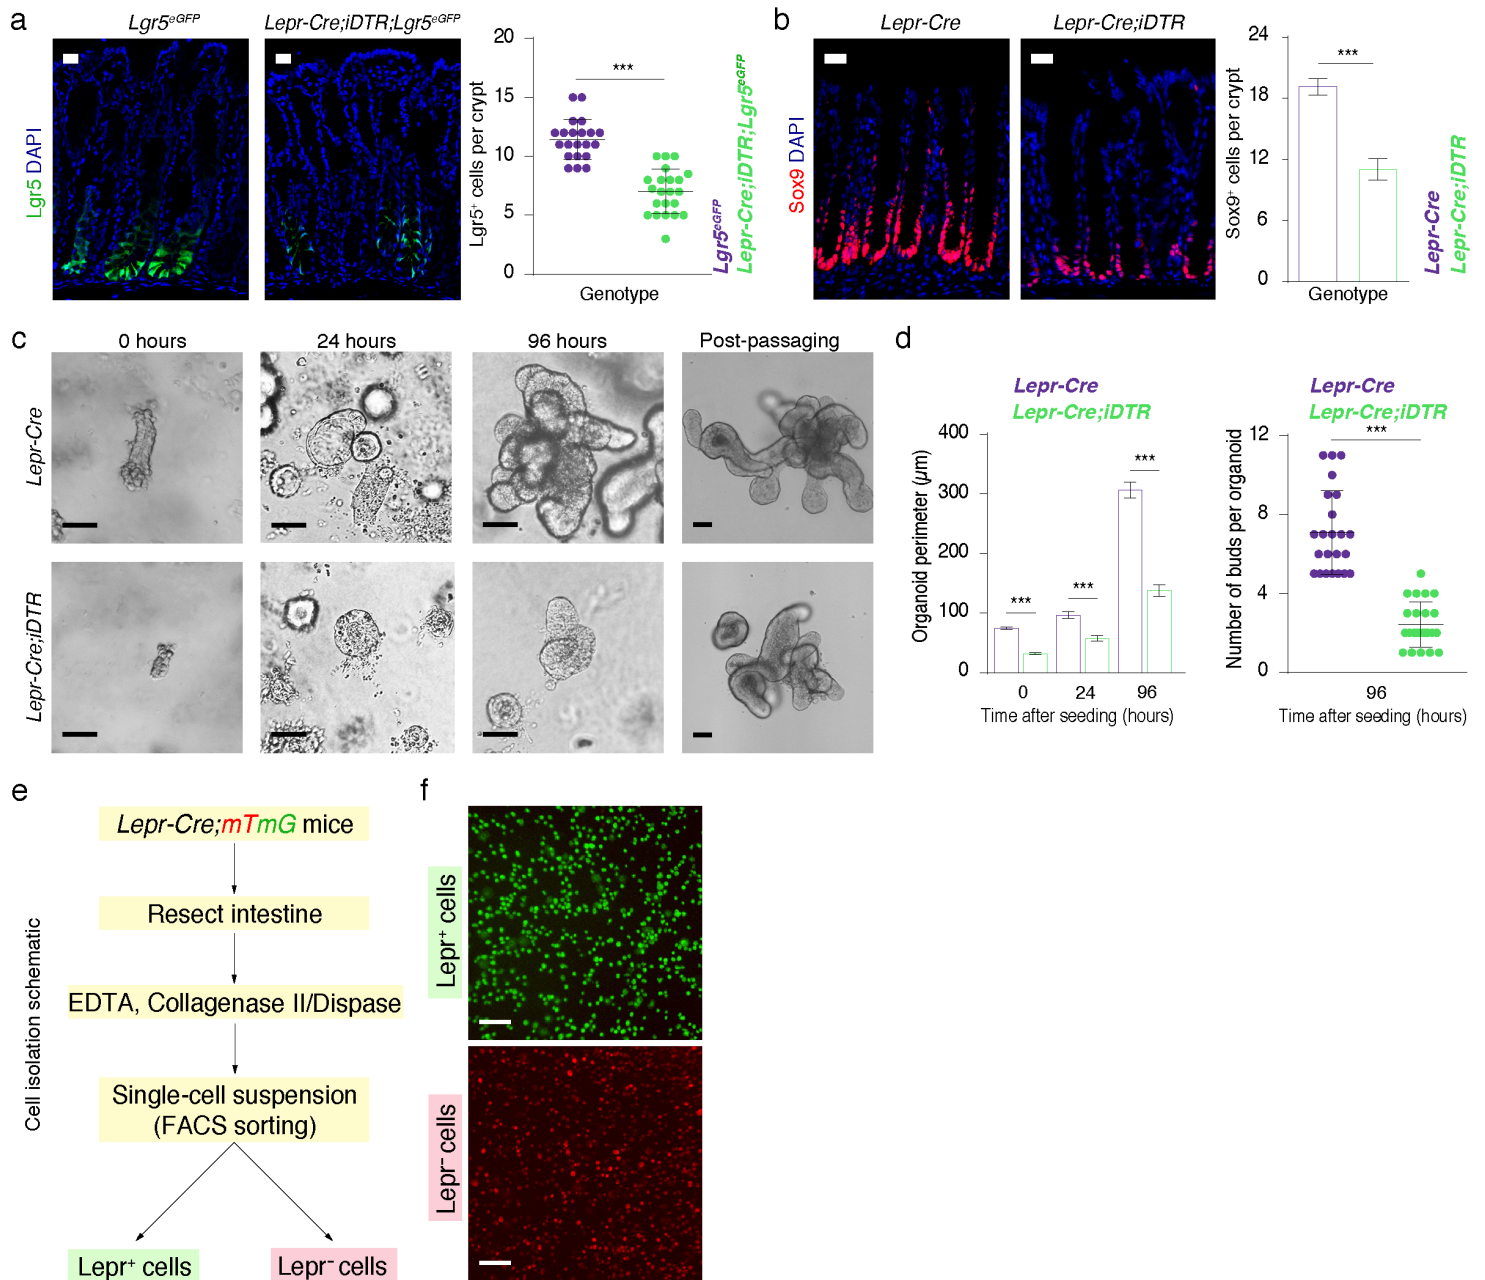

**Fig. S3 Ablation of Lepr<sup>+</sup> cells led to fewer ISCs in colon.** **a** Immunofluorescence for GFP (Lgr5) in the colons from *Lgr5<sup>eGFP</sup>* and *Lepr-Cre;iDTR;Lgr5<sup>eGFP</sup>* mice treated with DT for 10 consecutive days. Number of Lgr5<sup>+</sup> cells per crypt was quantified (n=3). Scale bar: 25  $\mu$ m. **b** Immunofluorescence for Sox9 in the colon from *Lepr-Cre* and *Lepr-Cre;iDTR* mice treated with DT for 10 consecutive days. Number of Sox9<sup>+</sup> cells per crypt was quantified (n=3). Scale bar: 25  $\mu$ m. **c** Intestinal organoid images from *Lepr-Cre* and *Lepr-Cre;iDTR* mice at 0, 24 and 96 hours after seeding. Intestinal organoid images from *Lepr-Cre* and *Lepr-Cre;iDTR* mice 5 days post-passaging. Mice were treated with DT for 10 consecutive days. Crypt cells were seeded at the same initial density. n=2 biologically independent experiments, 3 replicates each. Scale bar: 50  $\mu$ m. **d** Quantification of the organoid perimeter at indicated timepoints and the number of buds per organoid at 96 hours. Related to **c**. **e** Schematic depicting physical isolation of Lepr<sup>+</sup> (GFP<sup>+</sup>) and Lepr<sup>-</sup> (tdTomato<sup>+</sup>) cells. **f** Representative images of sorted Lepr<sup>+</sup> and Lepr<sup>-</sup> cells. Scale: 200  $\mu$ m. Values in the graphs represent means  $\pm$  SD. Unpaired student's t-test was used for calculating P values in **a**, **b** and **d**, \*\*\**P* < 0.001.
