# Supplementary material
Source: PubMed Central journal article supplement (PMC9253134)
Supplement: 41422_2022_643_MOESM4_ESM.pdf [file 41422_2022_643_MOESM4_ESM.pdf]

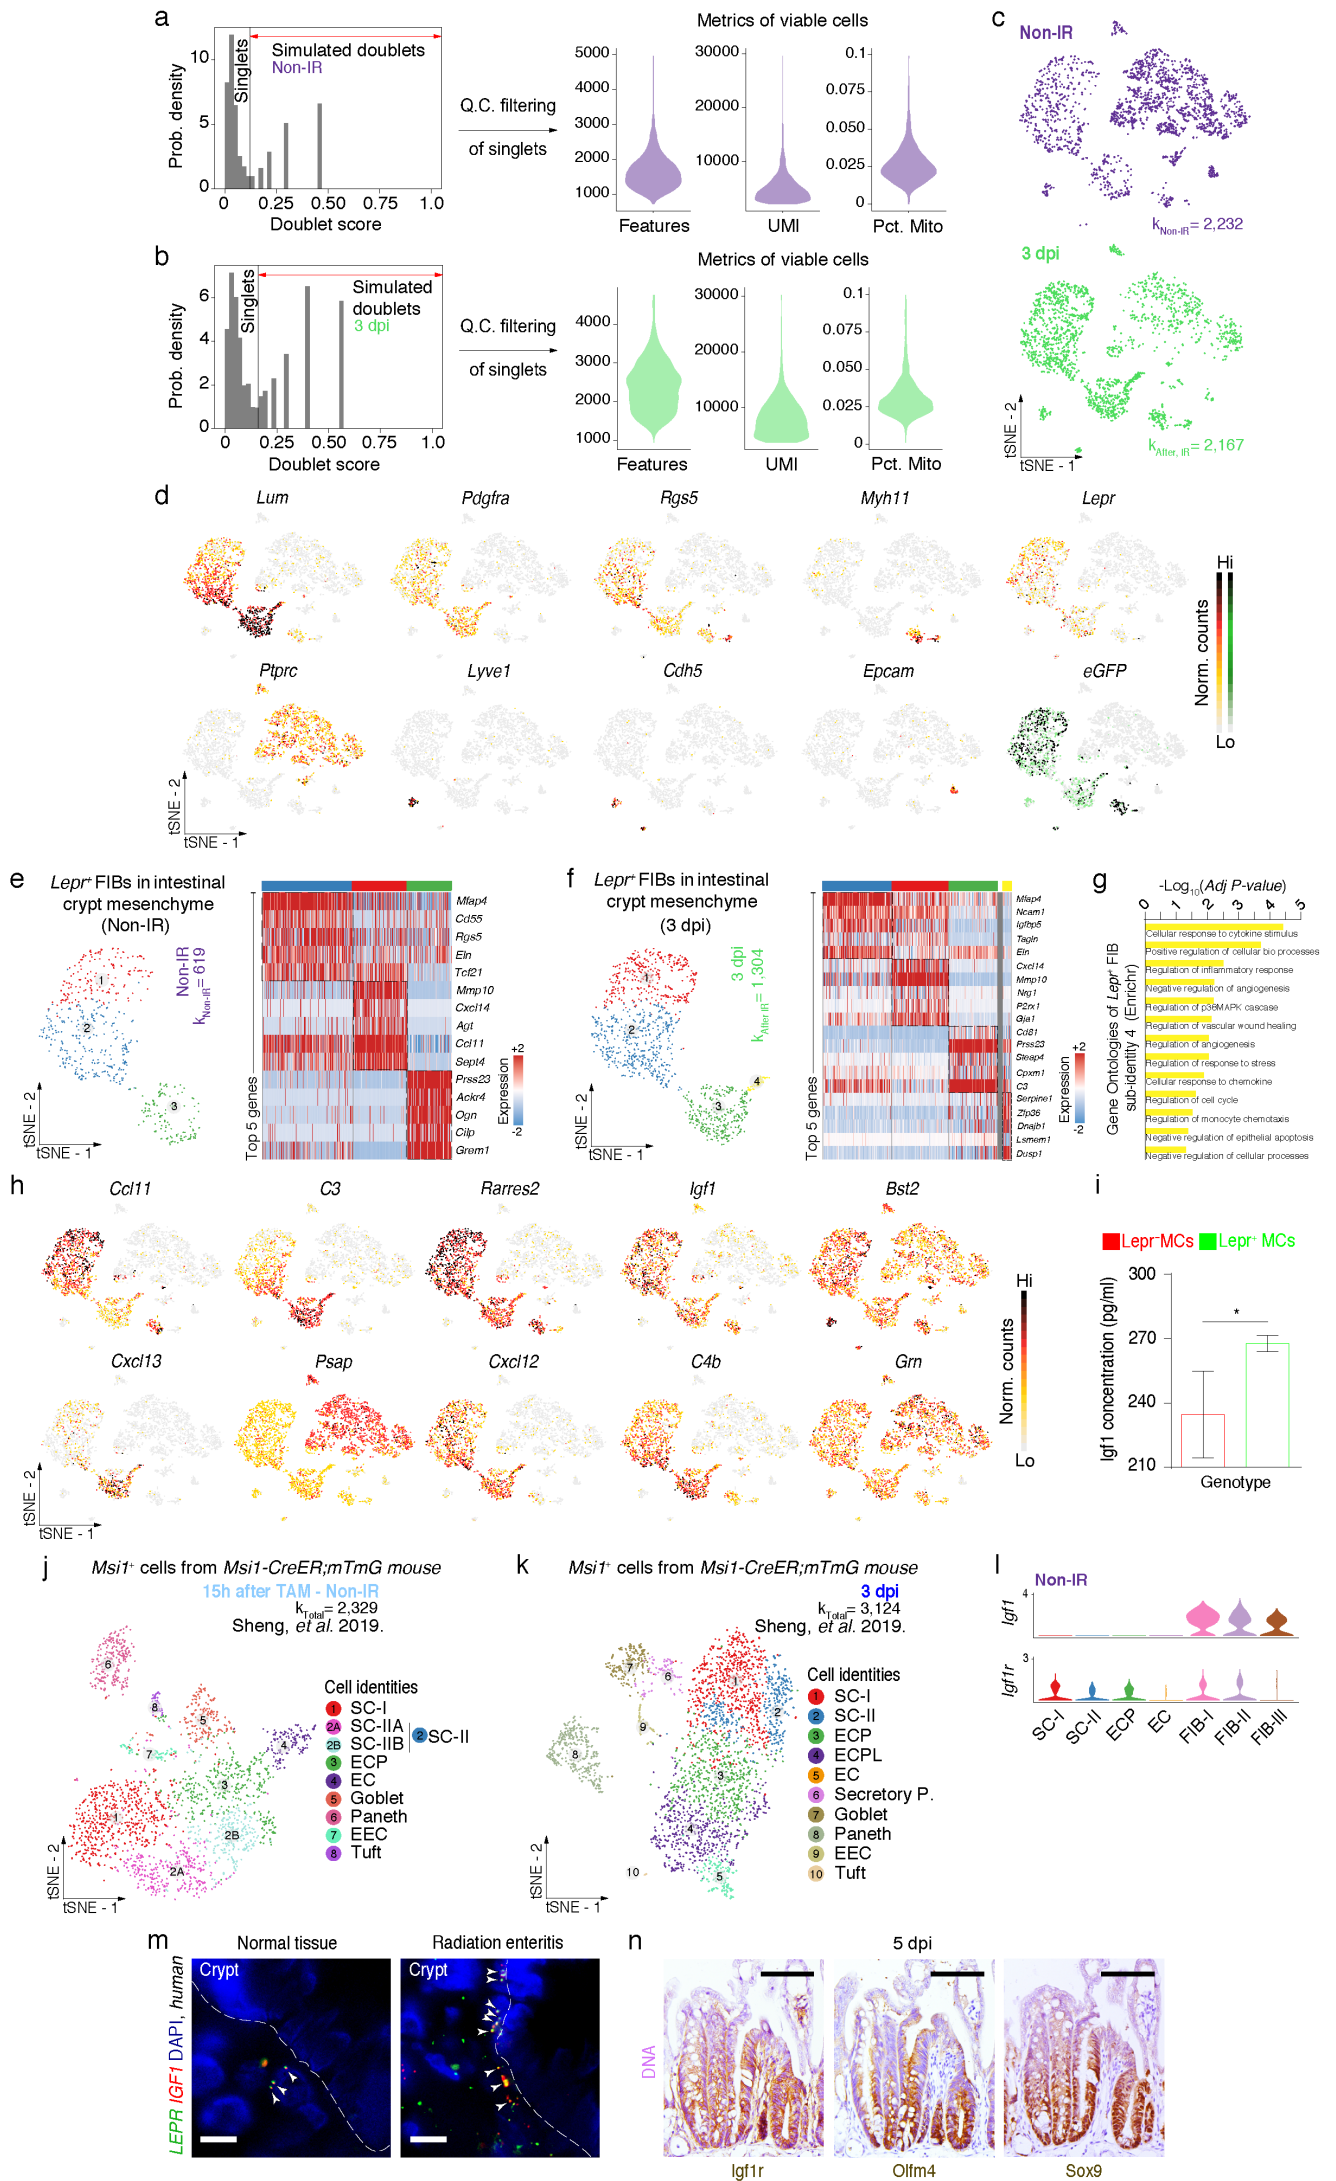

**Fig. S4 scRNA-seq analysis identified Igf1 as an important niche signal for ISCs.** **a, b** Bimodal distribution of predicted singlet and doublet intestinal crypt mesenchymal cells before and 3 days postirradiation. Straight solid line indicates user-defined doublet score threshold. Singlets were further filtered to remove low-quality cells. Distribution of features/cell, UMI counts/cell, and percentage of mitochondrial genes/cell in valid cells post-filtering. Valid cells were used in downstream query and comparative analysis. **c** Anchored and integrated *Lepr*<sup>+</sup> cells before and 3 days postirradiation (k=1,923 cells) visualized in two-dimensional tSNE embedding. Cells from each condition are color-coded; before irradiation – purple; 3 days postirradiation – green. Circle denotes cluster differences across conditions. **d** Feature plots of biomarker genes in each cell type cluster based on normalized counts. Expression levels for each cell are color-coded. Gray represents low expression and black represents high expression. **e, f** Heatmap of top five genes in *Lepr*<sup>+</sup> fibroblasts before (**e**) and 3 days postirradiation (**f**). Expression levels for each *Lepr*<sup>+</sup> fibroblast population are color-coded. Blue represents downregulated and red represents upregulated gene expression. **g** The gene ontologies of the top 60 specific genes in *Lepr*<sup>+</sup> FIB-IV. **h** Feature plots of the identified 10 ligands in each *Lepr*<sup>+</sup> fibroblast cluster based on normalized counts. Expression levels for each cell are color-coded. Gray represents low expression and black represents high expression. **i** Detecting supernatant levels of Igf1 from the culture medium of primary *Lepr*<sup>+</sup> MCs and *Lepr*<sup>-</sup> MCs after 24 hours of culture using ELISA (n=3). **j, k** t-SNE plots revealed nine distinct clusters of *Msi1*<sup>+</sup> cells sorted from *Msi1-CreERT2;mTmG* mice 15 hours after tamoxifen induction (**j**) and ten distinct clusters of *Msi1*<sup>+</sup> cells and their progeny 3 days after  $\gamma$ -IR (**k**). The general identity of each cell cluster is defined on the right. Data sets were adapted from our previous study.<sup>29</sup> **l** Violin plot showing the distributions of *Igf1r* in *Msi1*<sup>+</sup> epithelial cells and *Lepr*<sup>+</sup> cells at homeostasis. **m** *In situ* hybridization for *LEPR* and *IGF1* in intestinal crypts from normal and enteritis human tissues. White arrows represent double-positive cells (n=2). Scale bar: 10  $\mu$ m. **n** Immunohistochemistry for Igf1r, Olfm4 and Sox9 in intestine from wildtype mice five days postirradiation (n=3). Scale bar: 100  $\mu$ m. Value in the graph represent means  $\pm$  SD. Unpaired student's t-test was used for calculating P values in **i**, \* $P < 0.005$ .
