# Supplementary material
Source: PubMed Central journal article supplement (PMC9253134)
Supplement: 41422_2022_643_MOESM5_ESM.pdf [file 41422_2022_643_MOESM5_ESM.pdf]

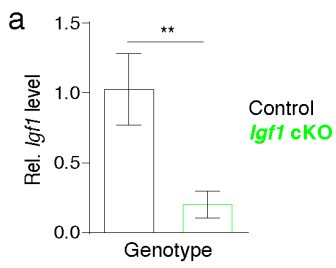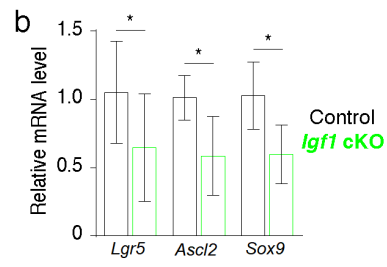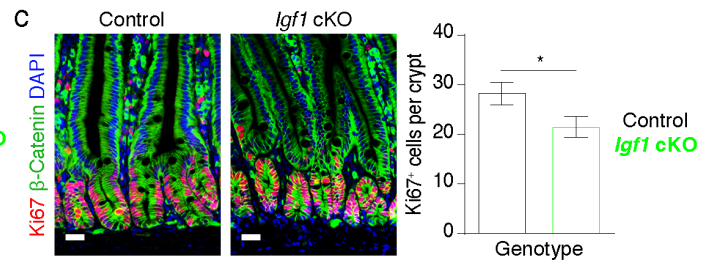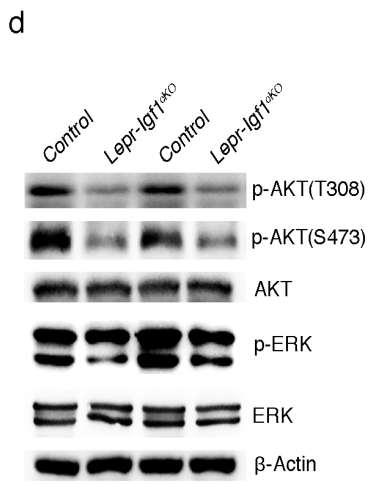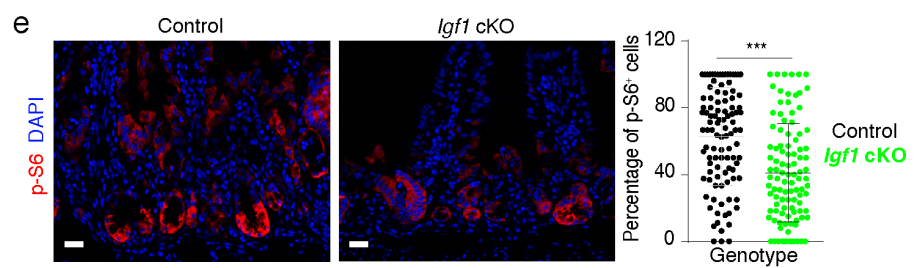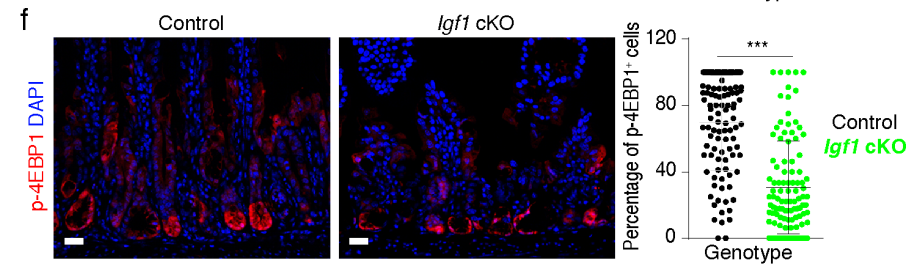

**Fig. S5 Deletion of *Igf1* suppressed p-AKT and pS6 activity.** **a** qRT-PCR analysis for *Igf1* in the intestine of control and *Igf1* cKO mice (n=3). **b** qRT-PCR analysis for *Lgr5*, *Ascl2* and *Sox9* in the jejunum of control and *Igf1* cKO mice (n=3). **c** Immunofluorescence for Ki67 and  $\beta$ -Catenin in jejunum of control and *Igf1* cKO mice. Quantification of Ki67<sup>+</sup> cells per crypt (n=3). Scale bar: 25  $\mu$ m. **d** Western blotting for p-AKT(T308), p-AKT(S473), AKT, p-ERK and ERK in jejunum from control and *Igf1* cKO mice 3 days postirradiation.  $\beta$ -Actin was used as a loading control. **e, f** Immunofluorescence for p-S6 (**e**) and p-4EBP1 (**f**) in the jejunum from control and *Igf1* cKO mice three days postirradiation. The percentage of p-S6<sup>+</sup> and p-4EBP1<sup>+</sup> cells in each focus was quantified. Scale bar: 25  $\mu$ m. Values in the graphs represent means  $\pm$  SD. Unpaired student's t-test was used for calculating P values in **a - c** and **e, f**, \*P < 0.05; \*\*P < 0.01; \*\*\*P < 0.001.
